# Supplementary material for: Microwave-Enhanced Crystalline Properties of Zinc Ferrite Nanoparticles
Source: MDPI journal article supplement (doi:10.3390/nano12172987), 2022-08-29
Supplement: s1 [file s1]

Archive with 1 entries (1 files):
- nanomaterials-1814152-suppl.pdf
